# Supplementary material for: In Vitro and In Vivo Genotoxicity Assessments and Phytochemical Analysis of the Traditional Herbal Prescription Siryung-Tang
Source: MDPI journal article supplement (doi:10.3390/molecules27134066), 2022-06-24
Supplement: s1 [file s1]

**Table S1.** System suitability test of the 12 markers for simultaneous analysis

| Marker | $k'$  | $\alpha$ | $N$     | $Rs$  | $T_f$ |
|--------|-------|----------|---------|-------|-------|
| 1      | 2.00  | 1.81     | 55709   | 20.79 | 1.08  |
| 2      | 3.63  | 1.81     | 198609  | 20.79 | 1.11  |
| 3      | 5.58  | 1.03     | 471340  | 2.25  | 1.16  |
| 4      | 5.72  | 1.03     | 563040  | 2.25  | 1.12  |
| 5      | 8.05  | 1.03     | 492258  | 2.58  | 1.03  |
| 6      | 8.26  | 1.03     | 806873  | 2.58  | 1.24  |
| 7      | 9.59  | 1.07     | 969634  | 8.16  | 1.16  |
| 8      | 10.28 | 1.01     | 626786  | 1.57  | 1.05  |
| 9      | 10.41 | 1.01     | 1072555 | 1.57  | 1.11  |
| 10     | 12.01 | 1.04     | 1173115 | 5.64  | 1.19  |
| 11     | 12.46 | 1.04     | 1276118 | 5.64  | 1.04  |
| 12     | 13.66 | 1.10     | 1308608 | 14.26 | 1.01  |

$k'$ ; capacity factor,  $\alpha$ ; relative retention,  $N$ ; theoretical plate number,  $Rs$ ; resolution, and  $T_f$ ; tailing factor 5-(Hydroxy-methyl)furfural (**1**), 3,4-dihydroxybenzaldehyde (**2**), liquiritin apioside (**3**), liquiritin (**4**), coumarin (**5**), baicalin (**6**), wogonoside (**7**), cinnamaldehyde (**8**), baicalein (**9**), glycyrrhizin (**10**), wogonin (**11**), and atractylenolide III (**12**).

**Table S2.** Repeatability for retention time of the 12 markers using HPLC ( $n = 6$ )

| Analyte   | No., Retention time (min) |       |       |       |       |       | Mean  | SD   | RSD (%) |
|-----------|---------------------------|-------|-------|-------|-------|-------|-------|------|---------|
|           | 1                         | 2     | 3     | 4     | 5     | 6     |       |      |         |
| <b>1</b>  | 8.40                      | 8.39  | 8.40  | 8.39  | 8.39  | 8.39  | 8.39  | 0.01 | 0.07    |
| <b>2</b>  | 12.94                     | 12.93 | 12.94 | 12.93 | 12.92 | 12.93 | 12.93 | 0.01 | 0.06    |
| <b>3</b>  | 18.39                     | 18.38 | 18.39 | 18.38 | 18.38 | 18.38 | 18.38 | 0.01 | 0.04    |
| <b>4</b>  | 18.79                     | 18.77 | 18.79 | 18.77 | 18.77 | 18.77 | 18.77 | 0.01 | 0.05    |
| <b>5</b>  | 25.28                     | 25.26 | 25.28 | 25.26 | 25.26 | 25.26 | 25.26 | 0.01 | 0.04    |
| <b>6</b>  | 25.89                     | 25.87 | 25.89 | 25.87 | 25.87 | 25.87 | 25.87 | 0.01 | 0.04    |
| <b>7</b>  | 29.58                     | 29.57 | 29.58 | 29.56 | 29.56 | 29.56 | 29.57 | 0.01 | 0.04    |
| <b>8</b>  | 31.49                     | 31.48 | 31.49 | 31.47 | 31.46 | 31.47 | 31.47 | 0.01 | 0.04    |
| <b>9</b>  | 31.87                     | 31.86 | 31.87 | 31.85 | 31.85 | 31.85 | 31.86 | 0.01 | 0.04    |
| <b>10</b> | 36.26                     | 36.25 | 36.26 | 36.24 | 36.24 | 36.24 | 36.25 | 0.01 | 0.03    |
| <b>11</b> | 37.59                     | 37.58 | 37.59 | 37.57 | 37.57 | 37.57 | 37.58 | 0.01 | 0.03    |
| <b>12</b> | 40.92                     | 40.90 | 40.91 | 40.89 | 40.89 | 40.89 | 40.90 | 0.01 | 0.03    |

5-(Hydroxy-methyl)furfural (**1**), 3,4-dihydroxybenzaldehyde (**2**), liquiritin apioside (**3**), liquiritin (**4**), coumarin (**5**), baicalin (**6**), wogonoside (**7**), cinnamaldehyde (**8**), baicalein (**9**), glycyrrhizin (**10**), wogonin (**11**), and atractylenolide III (**12**).

**Table S3.** Repeatability for peak area of the 12 markers using HPLC ( $n = 6$ )

| Analyte   | No., Peak area |         |         |         |         |         | Mean       | SD       | RSD (%) |
|-----------|----------------|---------|---------|---------|---------|---------|------------|----------|---------|
|           | 1              | 2       | 3       | 4       | 5       | 6       |            |          |         |
| <b>1</b>  | 2181315        | 2190273 | 2167605 | 2168303 | 2194796 | 2213853 | 2186024.17 | 17577.96 | 0.80    |
| <b>2</b>  | 2129581        | 2132364 | 2116548 | 2117639 | 2144098 | 2159151 | 2133230.17 | 16281.56 | 0.76    |
| <b>3</b>  | 574674         | 577107  | 572111  | 572237  | 580176  | 585492  | 576966.17  | 5180.82  | 0.90    |
| <b>4</b>  | 985415         | 987930  | 980831  | 982474  | 995695  | 1002893 | 989206.33  | 8495.90  | 0.86    |
| <b>5</b>  | 2535502        | 2542157 | 2523794 | 2521075 | 2553139 | 2574012 | 2541613.17 | 19796.52 | 0.78    |
| <b>6</b>  | 1678063        | 1681535 | 1669374 | 1669779 | 1690902 | 1705322 | 1682495.83 | 13756.24 | 0.82    |
| <b>7</b>  | 2183180        | 2188653 | 2172448 | 2173183 | 2200900 | 2220859 | 2189870.50 | 18494.31 | 0.84    |
| <b>8</b>  | 5797198        | 5813825 | 5772857 | 5765014 | 5835708 | 5883737 | 5811389.83 | 43973.45 | 0.76    |
| <b>9</b>  | 2473468        | 2480344 | 2462550 | 2465143 | 2496440 | 2513273 | 2481869.67 | 19618.41 | 0.79    |
| <b>10</b> | 1111409        | 1112251 | 1106050 | 1105236 | 1120720 | 1131211 | 1114479.50 | 9897.27  | 0.89    |
| <b>11</b> | 2064345        | 2068620 | 2054378 | 2052897 | 2055607 | 2073942 | 2061631.50 | 8636.55  | 0.42    |
| <b>12</b> | 2212860        | 2212805 | 2206683 | 2203328 | 2227744 | 2244486 | 2217984.33 | 15447.99 | 0.70    |

5-(Hydroxy-methyl)furfural (**1**), 3,4-dihydroxybenzaldehyde (**2**), liquiritin apioside (**3**), liquiritin (**4**), coumarin (**5**), baicalin (**6**), wogonoside (**7**), cinnamaldehyde (**8**), baicalein (**9**), glycyrrhizin (**10**), wogonin (**11**), and atractylenolide III (**12**).

**Table S4.** Information and composition of SRT

| Herbal medicine                  | Scientific name                            | English name                  | Family        | Used part           | Origin            | Amount (g) |
|----------------------------------|--------------------------------------------|-------------------------------|---------------|---------------------|-------------------|------------|
| Bupleuri Radix                   | <i>Bupleurum falcatum</i> L.               | Bupleurum Root                | Apiaceae      | Root                | Cheongsong, Korea | 767.0      |
| Alismatis Rhizoma                | <i>Alisma orientale</i> Juzep.             | Alisma Rhizome                | Alismataceae  | Tuber               | Imsil, Korea      | 622.6      |
| Atractylodis<br>Rhizoma Alba     | <i>Atractylodes japonica</i> Koidz.        | Atractylodes Rhizome<br>White | Compositae    | Rhizome             | Uljin, Korea      | 359.2      |
| Polyporus                        | <i>Polyporus umbellatus</i> Fires          | Polyporus Sclerotium          | Polyporaceae  | Sclerotium          | China             | 359.2      |
| Poria Sclerotium                 | <i>Poria cocos</i> Wolf                    | Poria                         | Polyporaceae  | Sclerotium          | Bonghwa, Korea    | 359.2      |
| Pinelliae Tuber                  | <i>Pinellia ternata</i> (Thunb.)<br>Makino | Pinellia Tuber                | Araceae       | Tuber               | China             | 335.0      |
| Scutellariae Radix               | <i>Scutellaria baicalensis</i> Georgi      | Scutellaria Root              | Lamiaceae     | Root                | Yeosu, Korea      | 287.6      |
| Ginseng Radix                    | <i>Panax ginseng</i> C.A.Mey.              | Ginseng                       | Araliaceae    | Root                | Punggi, Korea     | 287.6      |
| Glycyrrhizae Radix<br>et Rhizoma | <i>Glycyrrhiza uralensis</i> Fisch.        | Licorice                      | Leguminosae   | Root and<br>rhizome | China             | 287.6      |
| Cinnamomi Cortex                 | <i>Cinnamomum cassia</i> (L.) J.Presl      | Cinnamom Bark                 | Lauraceae     | Bark                | Veitanam          | 143.2      |
| Zingiberis Rhizoma<br>Recens     | <i>Zingiber officinale</i> Rosc.           | Raw Ginger                    | Zingiberaceae | Rhizome             | Seosan, Korea     | 191.8      |
| Total (g)                        |                                            |                               |               |                     |                   | 4000.0     |

**Table S5.** HPLC analysis conditions for simultaneous determination of the 12 marker components in SRT

| HPLC analysis parameter      |                                                            |       |       |
|------------------------------|------------------------------------------------------------|-------|-------|
| HPLC system                  | Prominence LC-20A series (Shimadzu, Kyoto, Japan)          |       |       |
| Detector                     | Photo-diode array detector                                 |       |       |
| Detection wavelength (nm)    | 220, 255, 275, 280, and 290                                |       |       |
| Column                       | SunFire C18 (4.6 × 250 mm, 5 μm, Waters, Milford, MA, USA) |       |       |
| Column oven temperature (°C) | 40.0                                                       |       |       |
| Flow rate (mL/min)           | 1.0                                                        |       |       |
| Injection volume (μL)        | 10.0                                                       |       |       |
| Mobile phase                 | A: 0.1% (v/v) formic acid in distilled water               |       |       |
|                              | B: 0.1% (v/v) formic acid in acetonitrile                  |       |       |
| Gradient elution             | Time (min)                                                 | A (%) | B (%) |
|                              | 0                                                          | 95    | 5     |
|                              | 40                                                         | 40    | 60    |
|                              | 50                                                         | 0     | 100   |
|                              | 55                                                         | 0     | 100   |
|                              | 60                                                         | 95    | 5     |
|                              | 70                                                         | 95    | 5     |

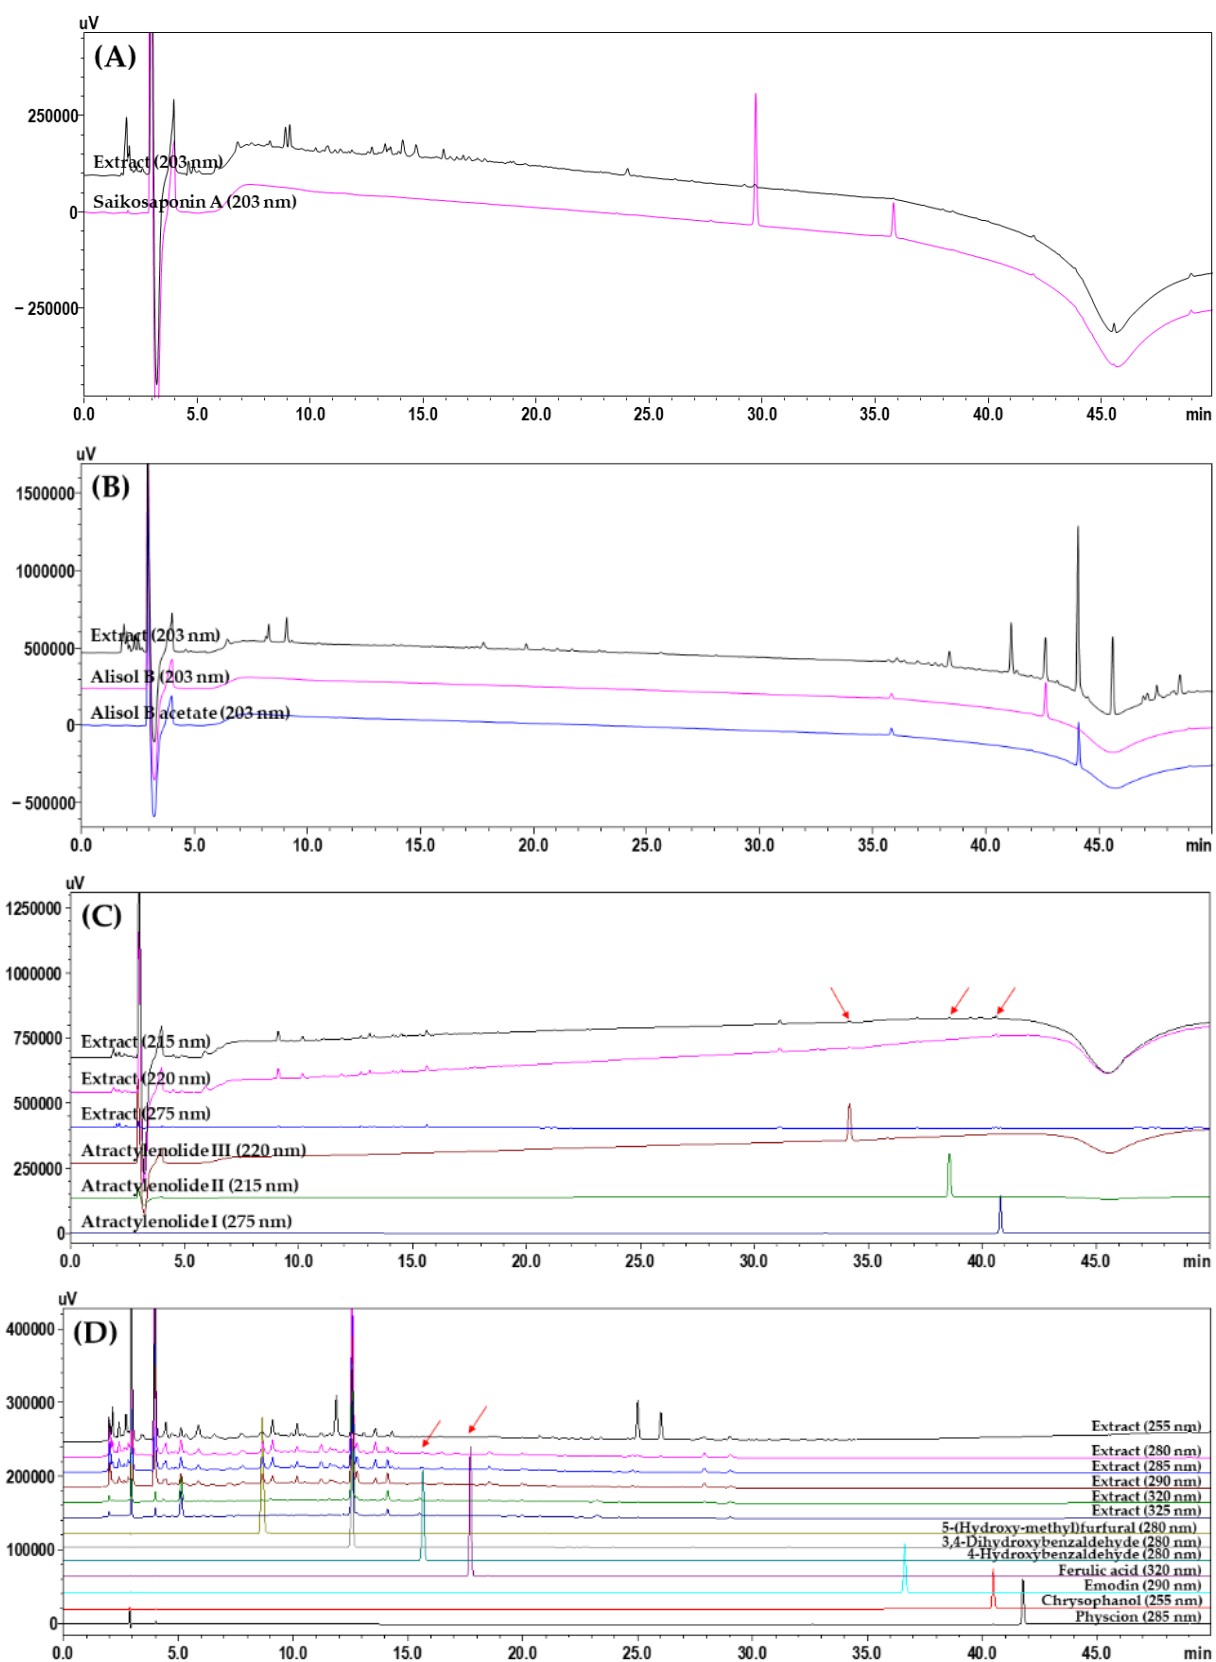

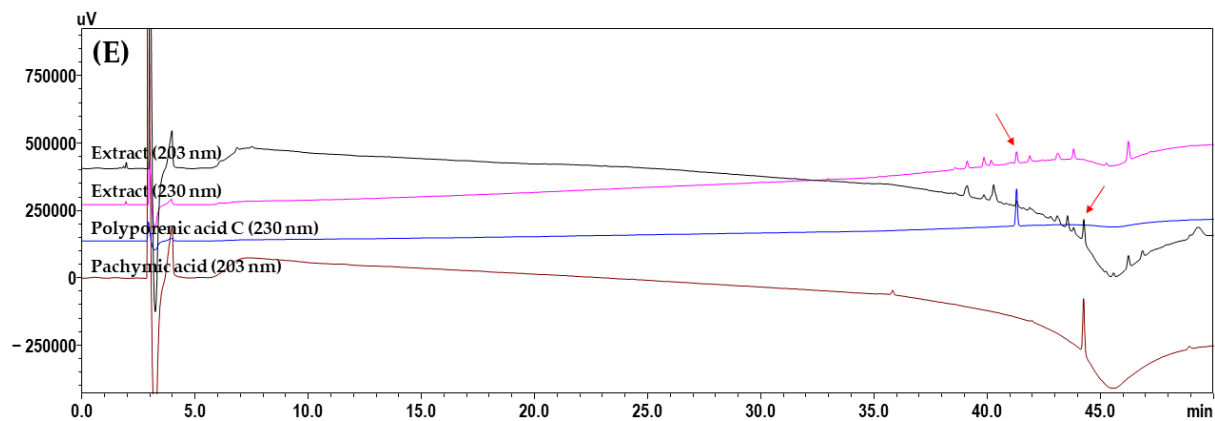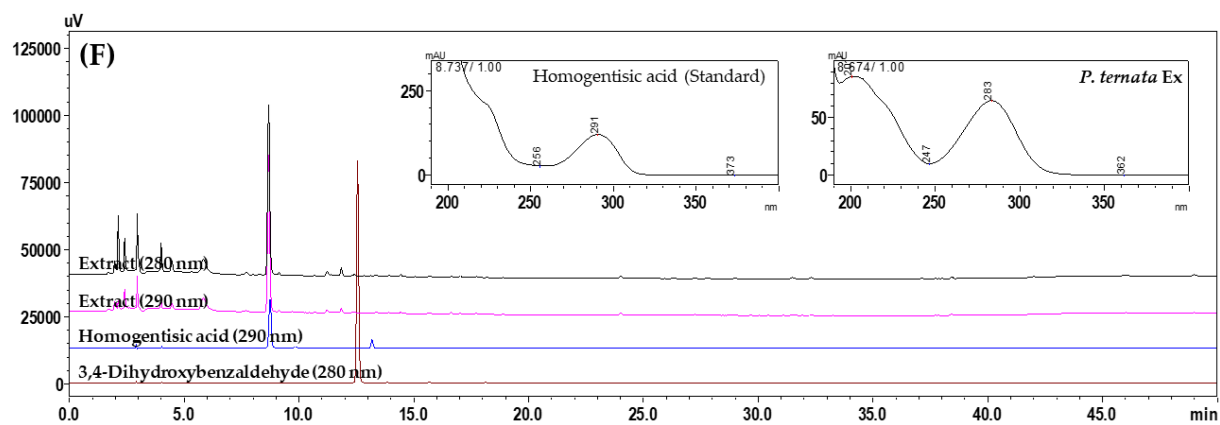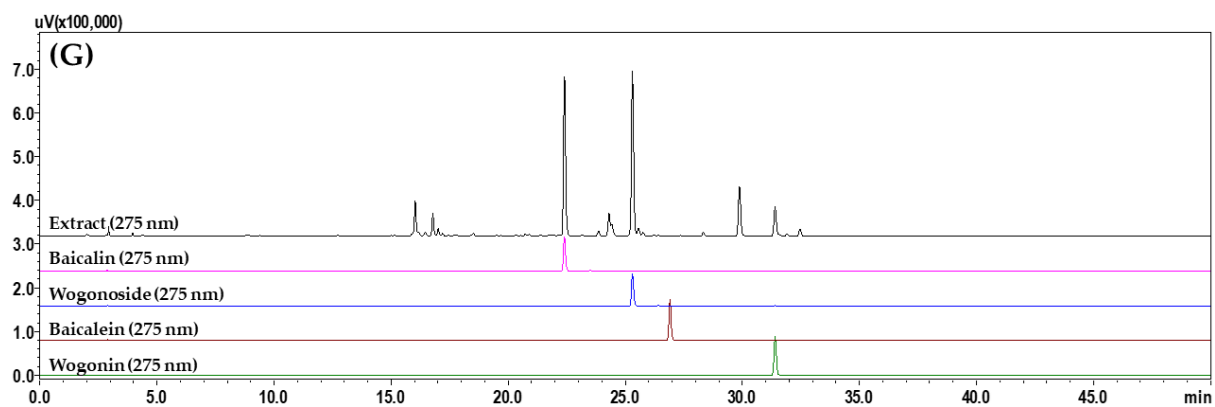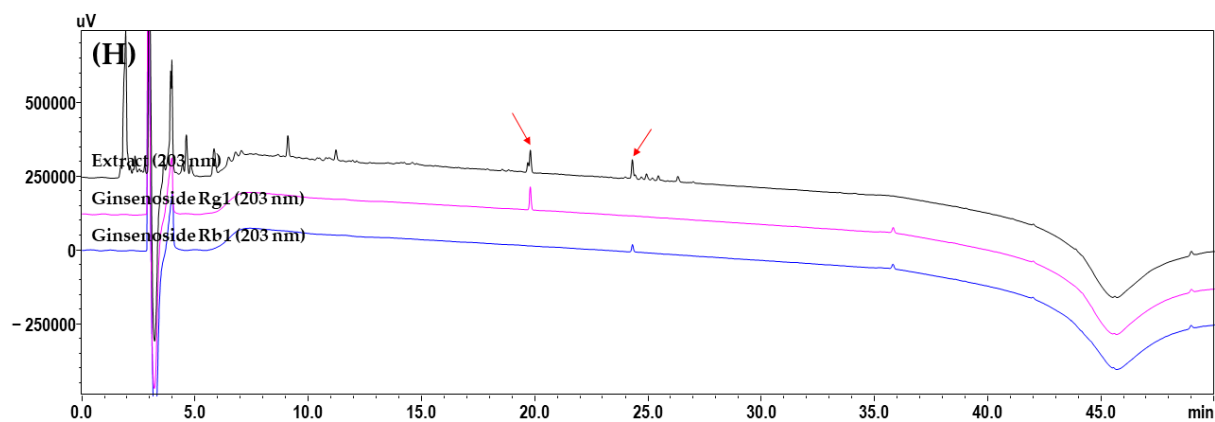

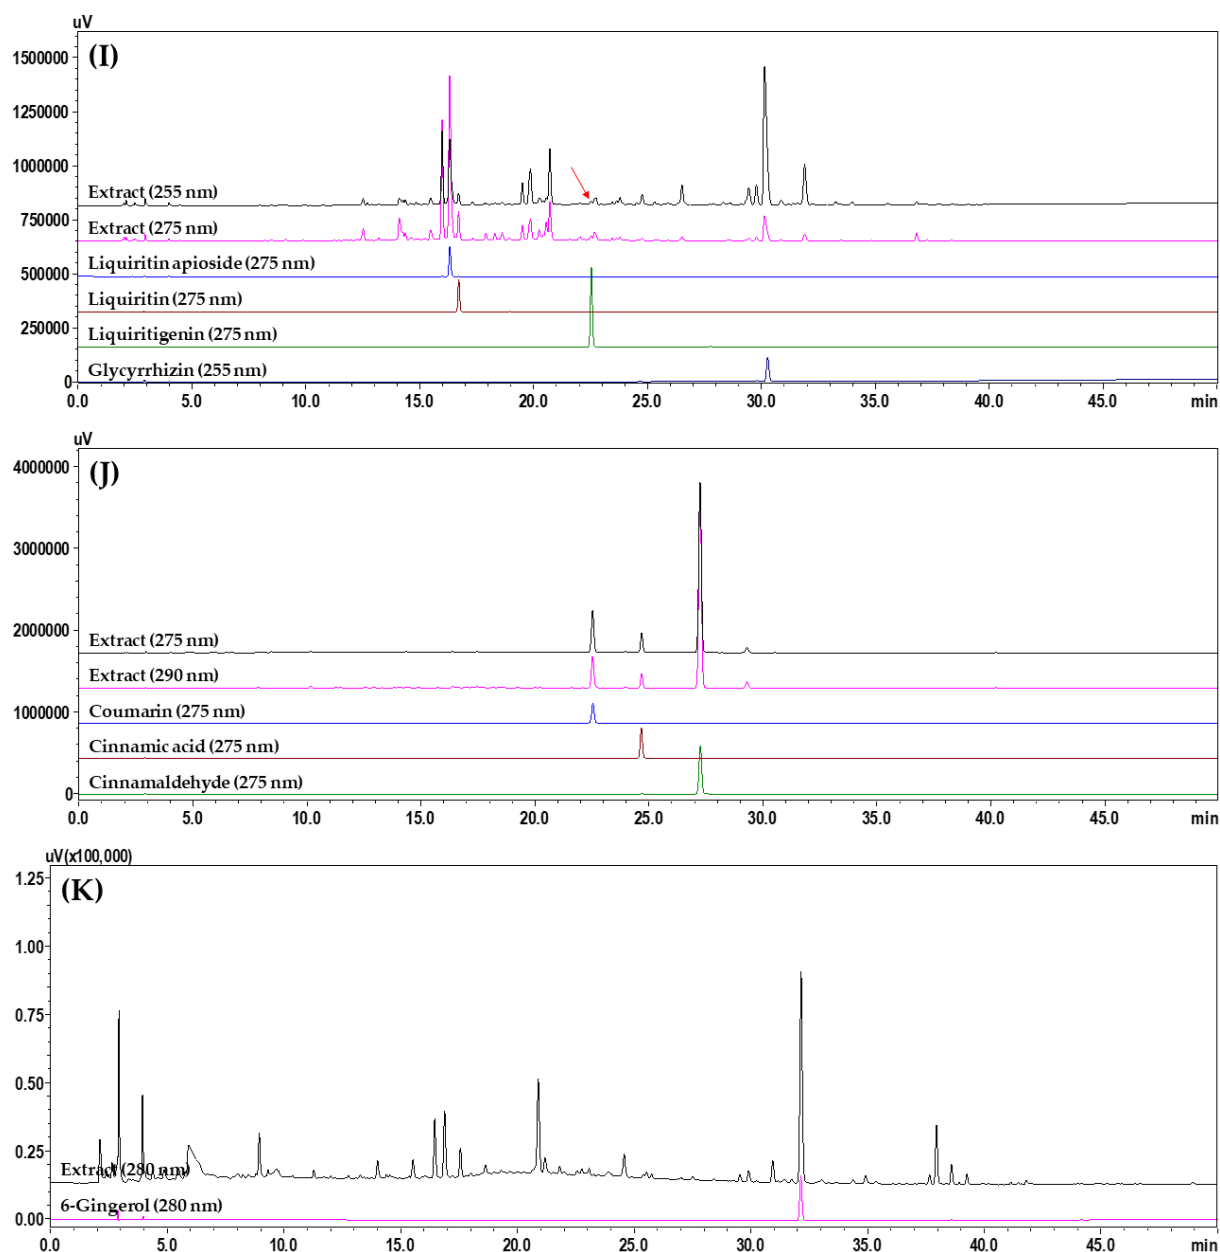

**Figure S1.** HPLC chromatogram of water extract of each raw herbal medicine and their major components. A, *B. falcatum*; B, *A. orientale*; C, *A. japonica*; D, *P. umbellatus*; E, *P. cocos*; F, *P. ternata*; G, *S. baicalensis*; H, *P. ginseng*; I, *G. uralensis*; J, *C. cassia*; and K, *Z. officinale*.



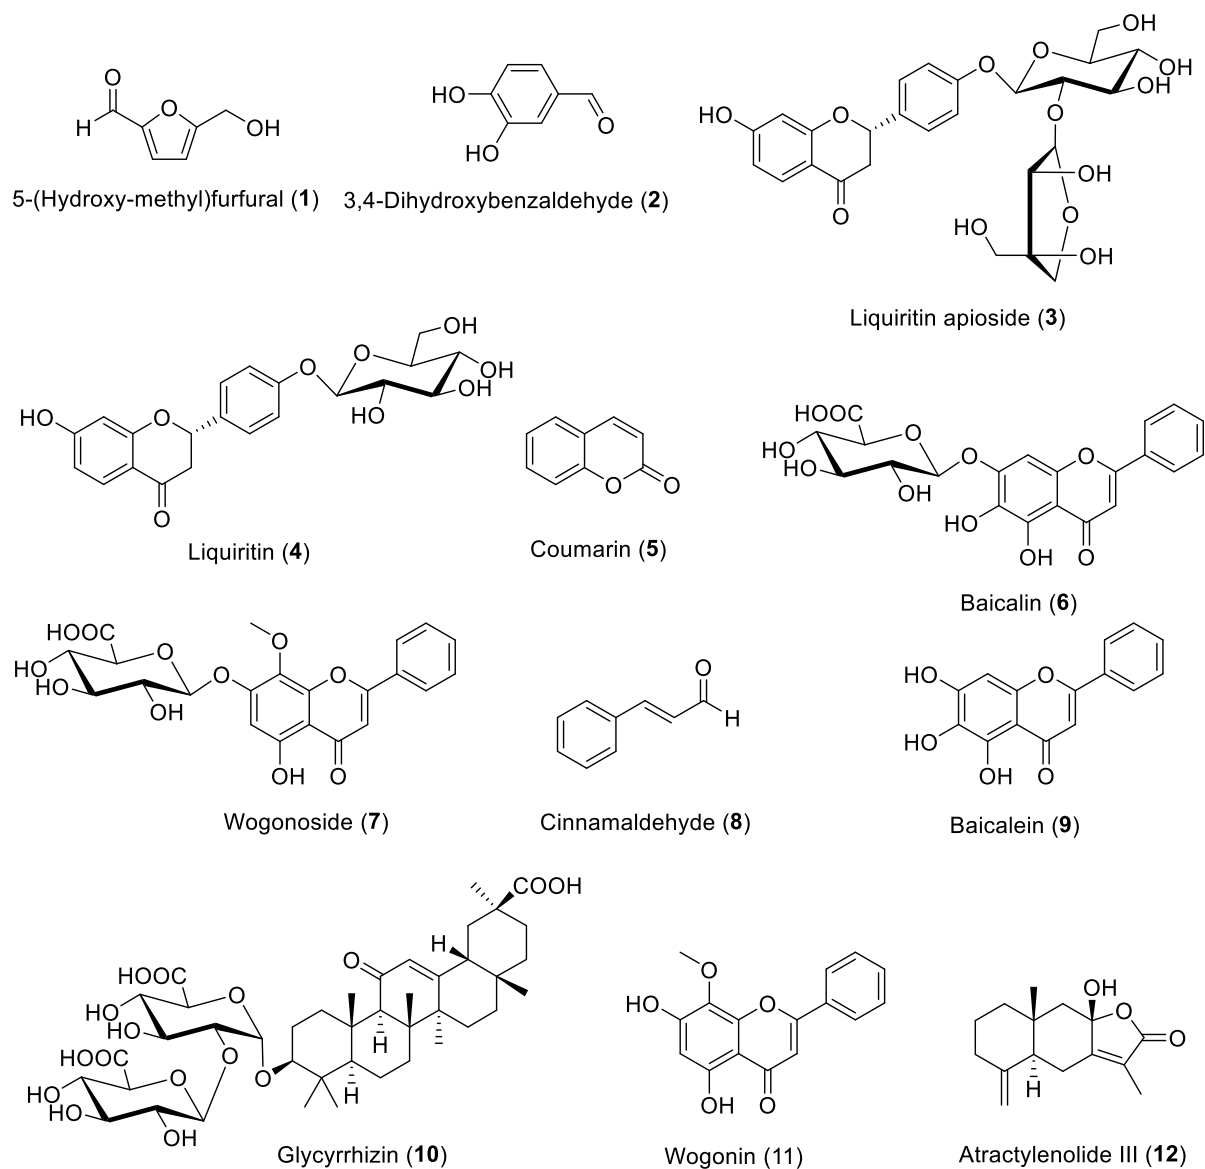

**Figure S2.** Chemical structures of the 12 marker components in SRT.
